# Supplementary material for: Preparation of magnetic decorated polyacrylonitrile grafted chitosan as a new bio- inspired nanocatalyst for the synthesis of dihydropyrano [2,3-c]pyrazoles and 2-amino-3- cyano-4H-pyran derivatives
Source: Research Square preprint supplement (doi:10.21203/rs.3.rs-7003635/v1), 2025-07-10
Supplement: Supplementary file 1 [file e6225f846213ebdc79912df4.docx]

**Electronic Supporting Information**

**Preparation of magnetic decorated polyacrylonitrile grafted chitosan as a new bio-inspired nanocatalyst for the synthesis of dihydropyrano [2,3-*c*]pyrazoles and 2-amino-3-cyano-4*H*-pyran derivatives**

Niloufar Nashibi1, Mohammad G. Dekamin1, Ali Maleki1

*1Pharmaceutical and Biologically-Active Compounds Research Laboratory, Department of Chemistry, Iran University of Science and Technology, Tehran 16846-13114, Iran*

*Tel: +98-21-77240640-50; fax: +98-21-73021584; e-mail: mdekamin@iust.ac.ir*

| **Page** | **Contents** |
| --- | --- |
| **S1** | **Title page** |
| **S3** | **Fig. S1.** Structure of selected examples of biologically- and pharmacologically-active dihydropyrano [2,3-c] pyrazole and 4*H*-pyrans.derivatives |
| **S3** | **Fig. S2.** Schematic representation for the preparation of CS-g-PAN/Fe3O4 nanoparticles (1) |
| **S4** | **Fig. S3.** One-pot three-component synthesis of highly substituted dihydropyrano [2,3-*c*] pyrazole (DHPPs) and 4*H*-pyrans derivatives catalyzed by the magnetic CS-g-PAN/Fe3O4 nanoparticles. |
| **S4** | **Fig. S4.** FTIR spectra of (a) PAN, (b) CS, (c) CS-g-PAN and (d) the CS-g-PAN/Fe3O4 |
| **S5** | **Fig. S5.** FESEM images of the CS-g-PAN nanoparticles (**1**). |
| **S5** | **Fig. S6.** XRD patterns of the CS-g-PAN/Fe3O4 nanoparticles (**1**), CS-g-PAN and CS |
| **S6** | **Fig. S7.** EDX spectra of the CS-g-PAN/Fe3O4 nanoparticles (**1**), along with its elemental mapping for a fresh sample. |
| **S6** | **Fig. S8.** Hysteresis diagram of the CS-g-PAN/Fe3O4 nanoparticles (**1**) |
| **S7** | **Fig. S9.** (a) The N2 adsorption–desorption isotherm of CS-g-PAN catalyst (**1**) and (b) its pore width. |
| **S7** | **Fig. S10.** TGA patterns of the CS-g-PAN/Fe3O4 nanoparticles (**1**) |
| **S8** | **Fig. S11.** FTIR spectra of the recycled CS-g-PAN/Fe3O4 MNPs (**1**) after the first run (Down, blue curve); and five run (Top, red curve) in the model reaction for the synthesis of 6k. |
| **S9** | **Fig. S12.** 1H NMR spectrum of compound (**6a**) |
| **S10** | **Fig. S13.** 1H NMR spectrum of compound (**6k**) |
| **S11** | **Fig. S14.** 1H NMR spectroscopy of the 4*H*-Pyran (**7a**) |
| **S12** | **Fig. S15.** 1H NMR spectroscopy of the 4*H*-Pyran (**7j**) |
| **S13** | **Fig. S16.** 1H NMR spectroscopy of the 4*H*-Pyran (**7i**) |


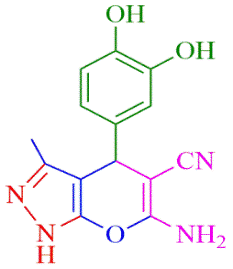

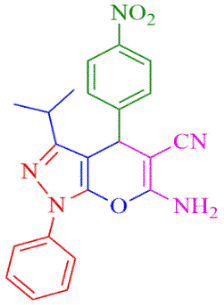

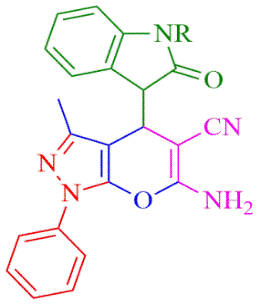

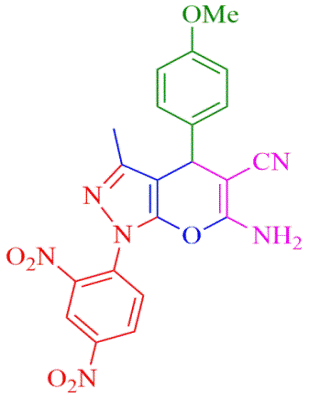

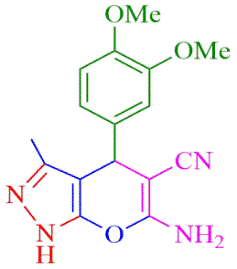


(Anticancer activity) **A**

(Inhibitor of human CHK1 kinase) **C**

(Antibacterial) **B**

(Antifungal) **E**

(Anti-tumor agent) **D**

**Fig. S1.** Structure of selected examples of biologically- and pharmacologically-active dihydropyrano [2,3-*c*] pyrazole and 4*H*-pyran derivatives.

(Tumor vascular-disrupting agent) **F**

(Antiproliferative agent) **G**

(Anticancer agent) **H**


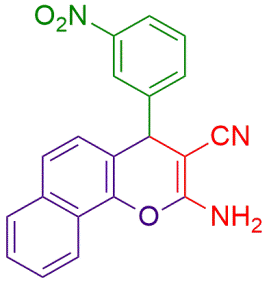

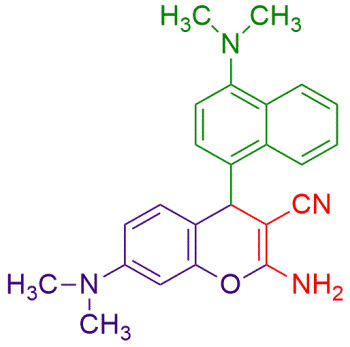

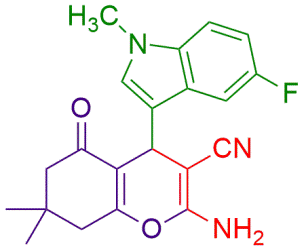

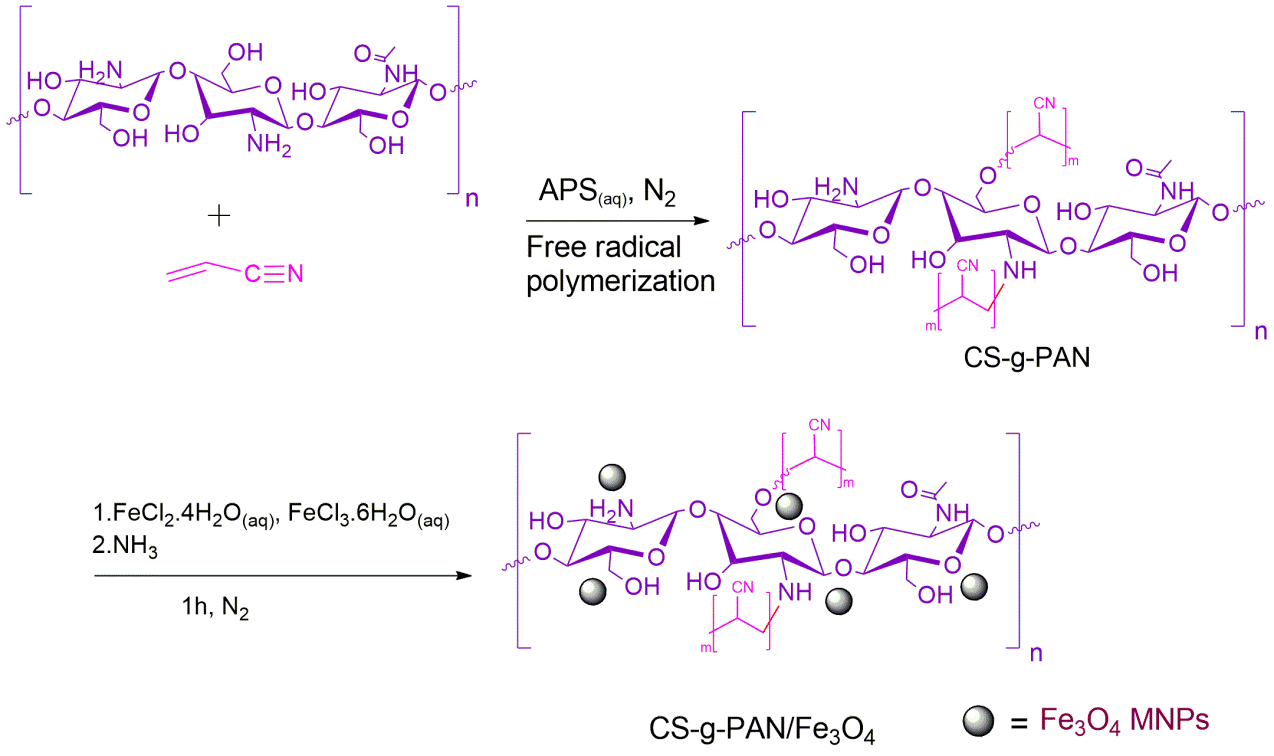


**Fig. S2.** Schematic representation for the preparation of CS-g-PAN/Fe3O4 nanoparticles (**1**).

**Fig. S3.** One-pot three-component synthesis of highly substituted dihydropyrano [2,3-*c*] pyrazole (DHPPs) and 4*H*-pyrans derivatives catalyzed by the magnetic CS-g-PAN/Fe3O4 nanoparticles.


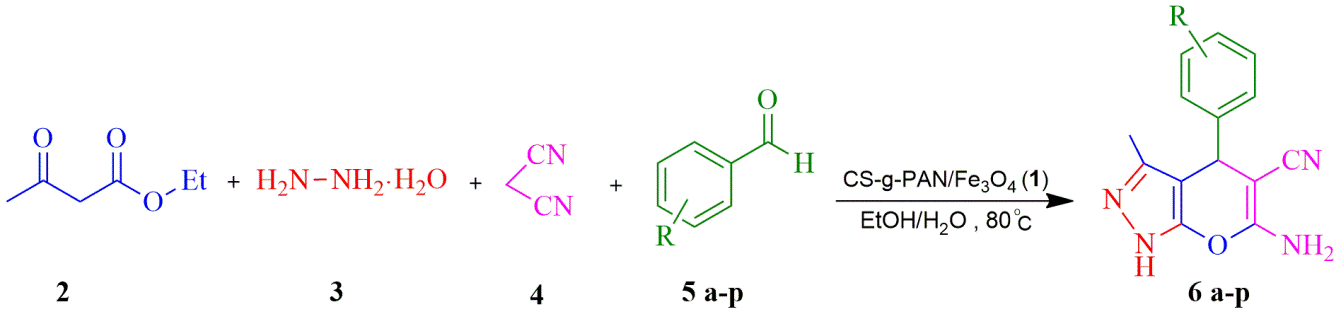

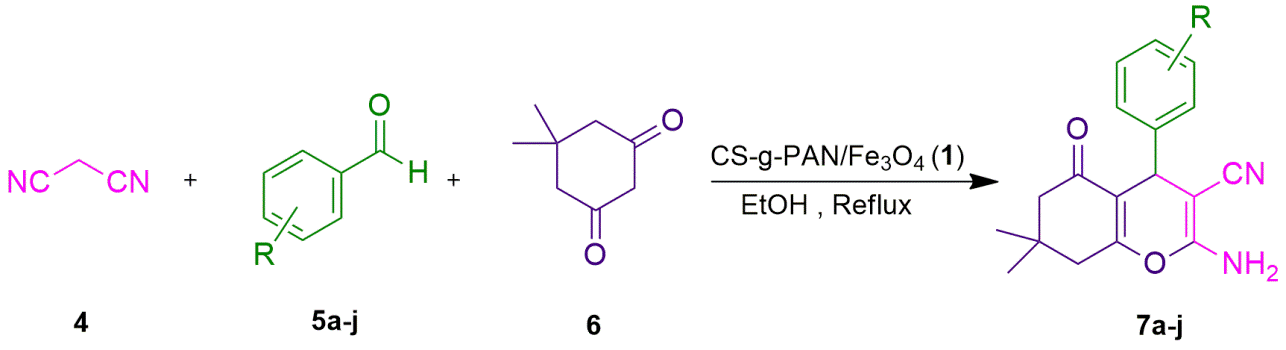


**a)**

**b)**


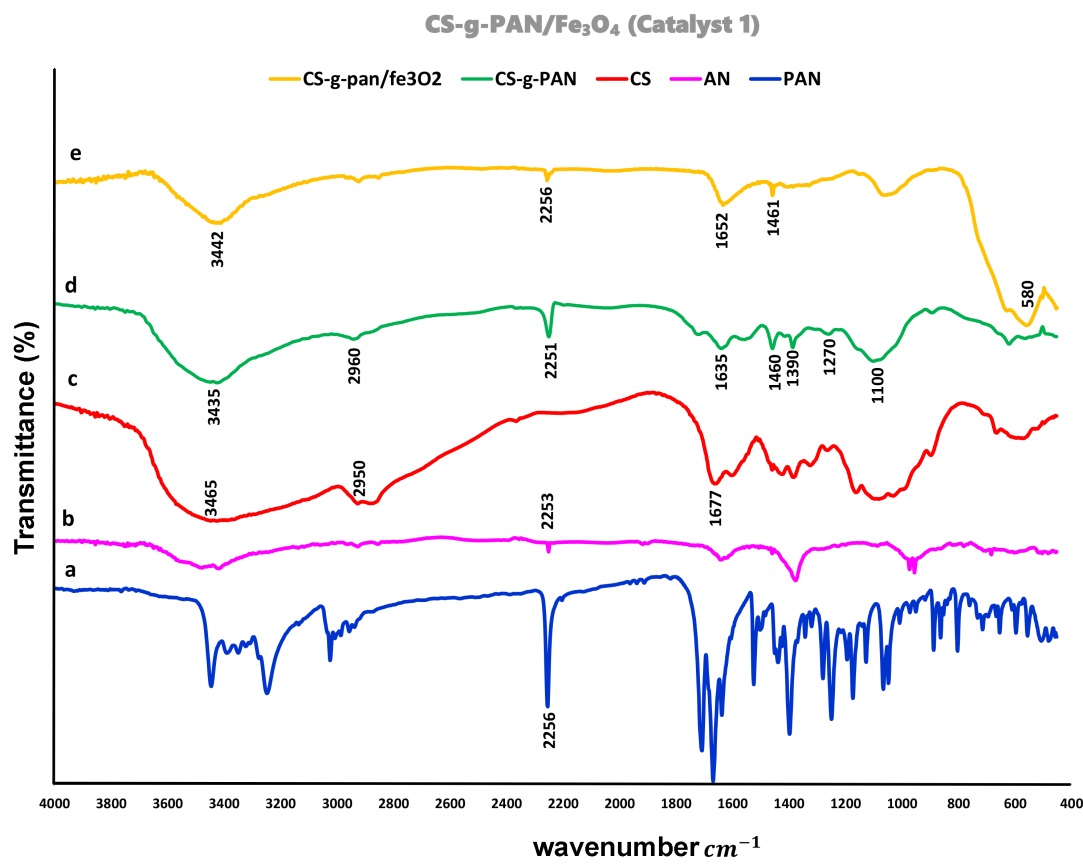


**Fig. S4.** FTIR spectra of (a) PAN, (b) CS, (c) CS-g-PAN and (d) the CS-g-PAN/Fe3O4.

|  | (**a**) |  | (**b**) |  |
| --- | --- | --- | --- | --- |
|  | (**c**) | 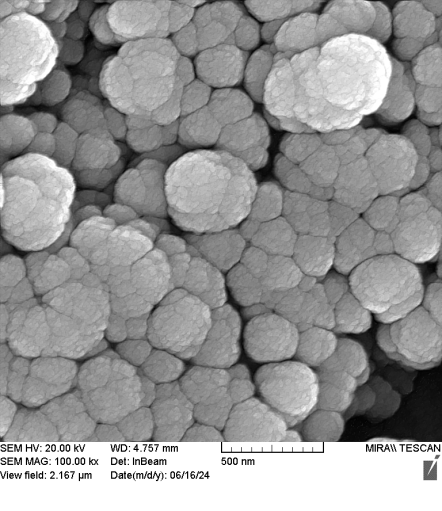 | (**d**) | 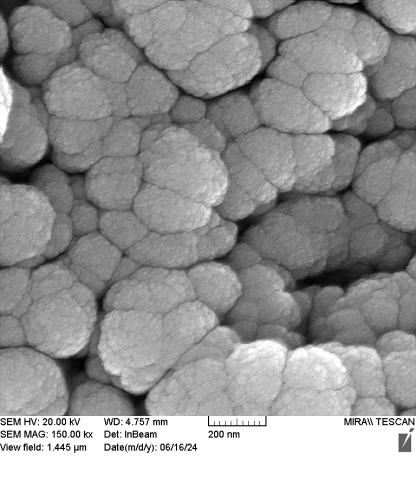 |
| **Fig. S5.** FESEM images of the CS-g-PAN (a-b) and CS-g-PAN/Fe3O4 (c-d) nanoparticles (**1**). | | | | |


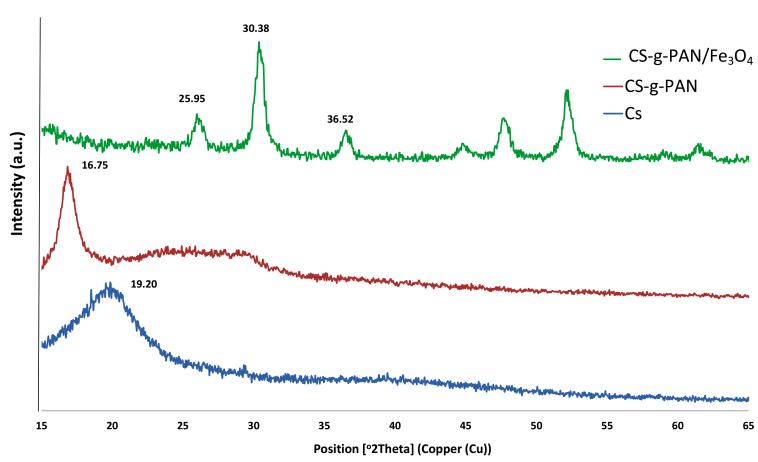


**Fig. S6.** XRD patterns of the CS-g-PAN/Fe3O4 nanoparticles (**1**), CS-g-PAN and CS.


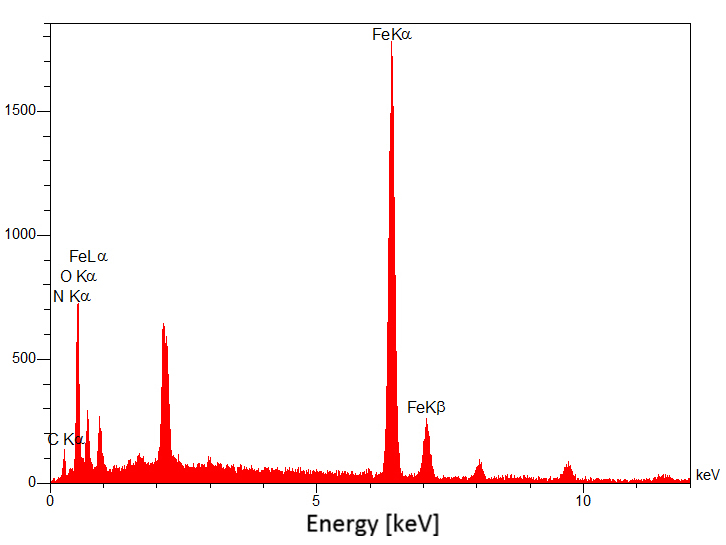

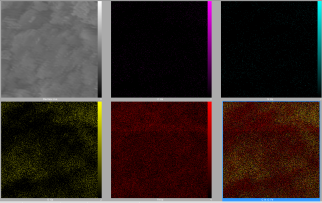


**Fig. S7.** EDX spectra of the CS-g-PAN/Fe3O4 nanoparticles (**1**), along with its elemental mapping for a fresh sample.

**a**

**b**

**Fig. S8.** Hysteresis diagram of the CS-g-PAN/Fe3O4 nanoparticles (**1**).


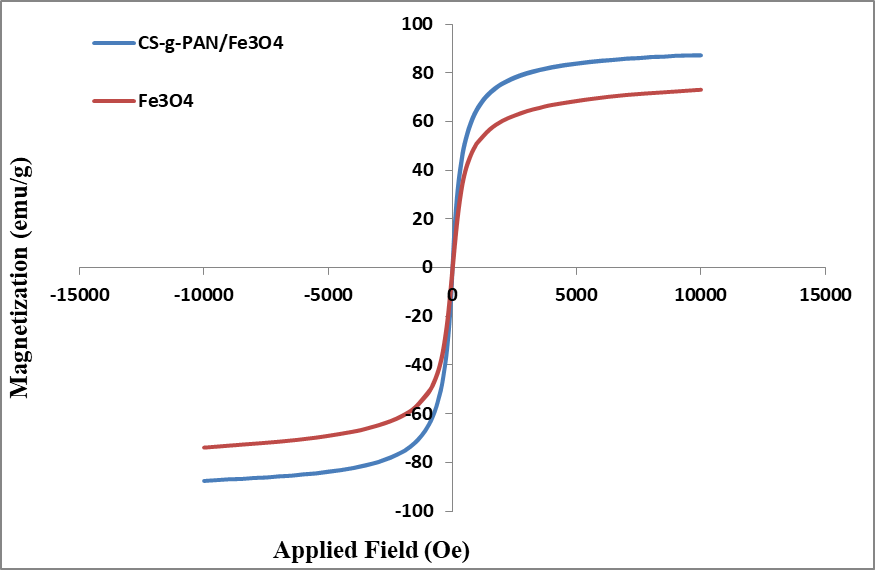

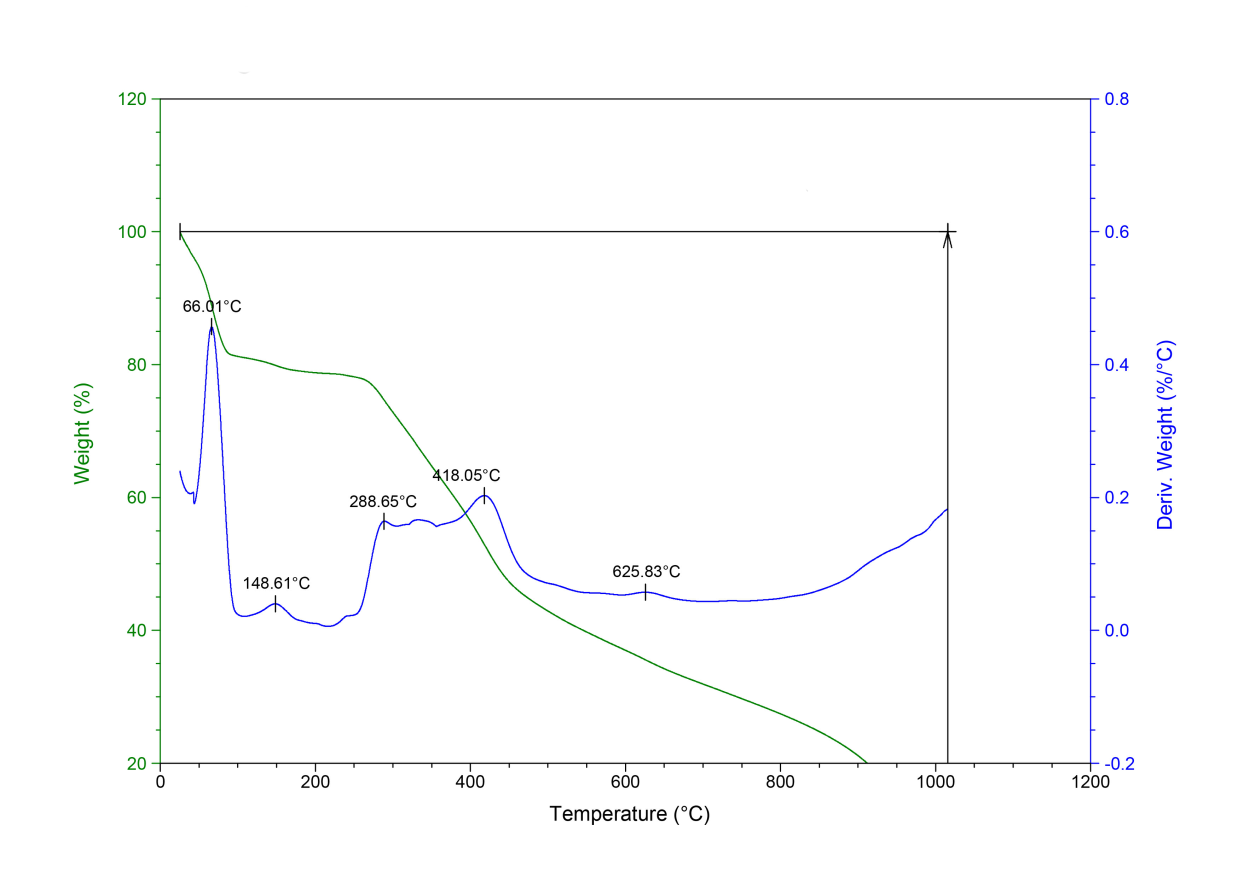


**Fig. S10.** TGA patterns of the CS-g-PAN/Fe3O4 nanoparticles (**1**).


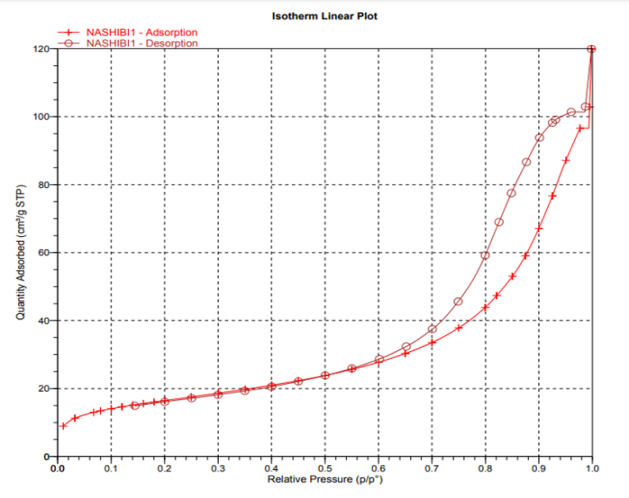

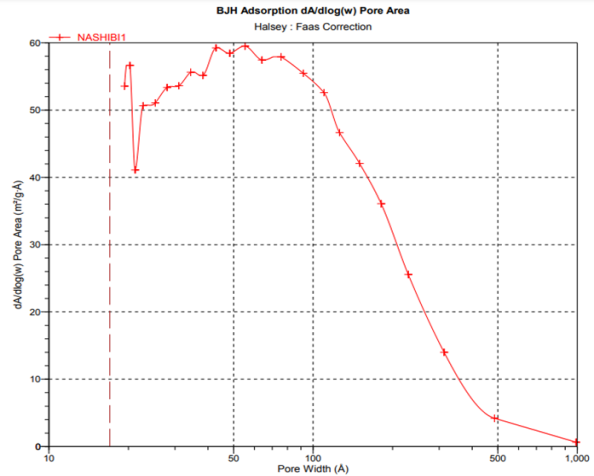


**Fig. S9.** (a) The N2 adsorption–desorption isotherm of CS-g-PAN catalyst (**1**) and (b) its pore width.

a

b


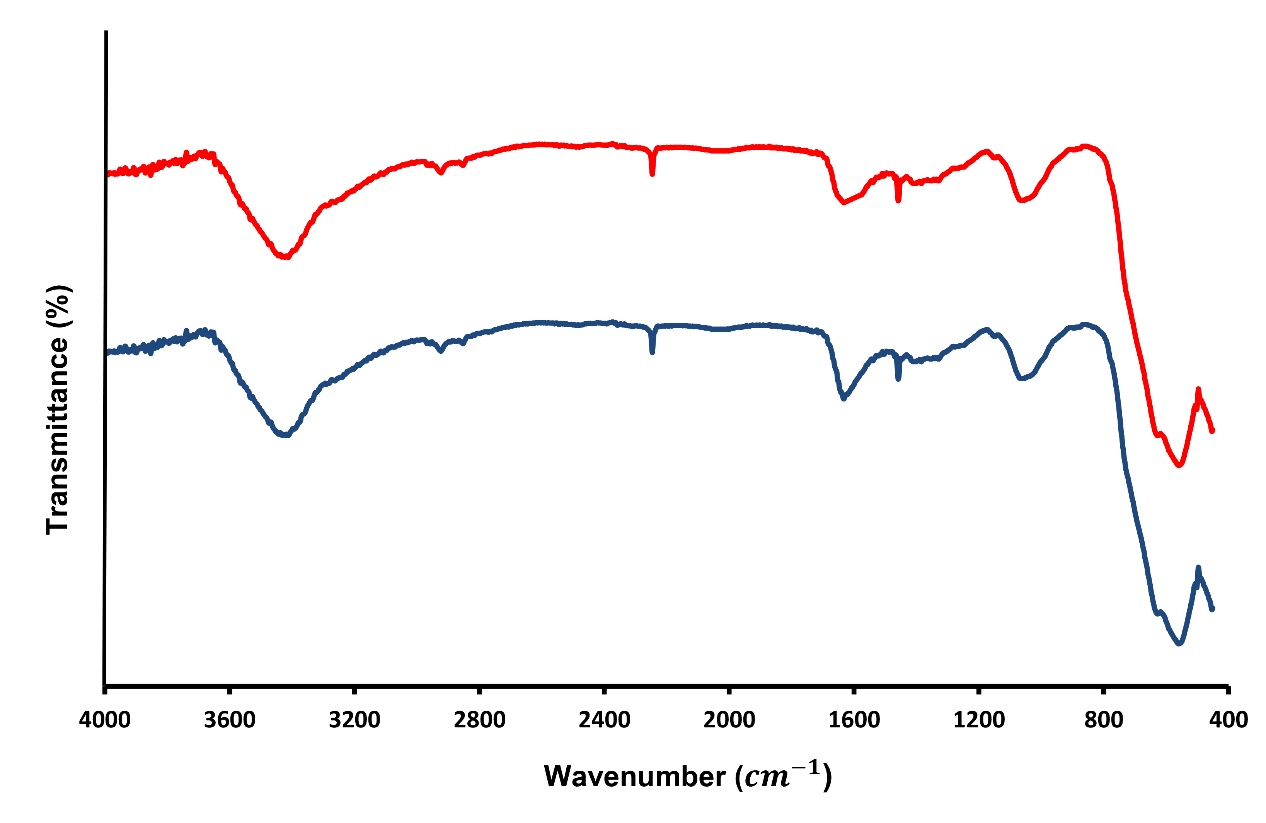


**Fig. S11.** FTIR spectra of the recycled CS-g-PAN/Fe3O4 MNPs (**1**) after the first run (Down, blue curve); and five run (Top, red curve) in the model reaction for the synthesis of **6k**.




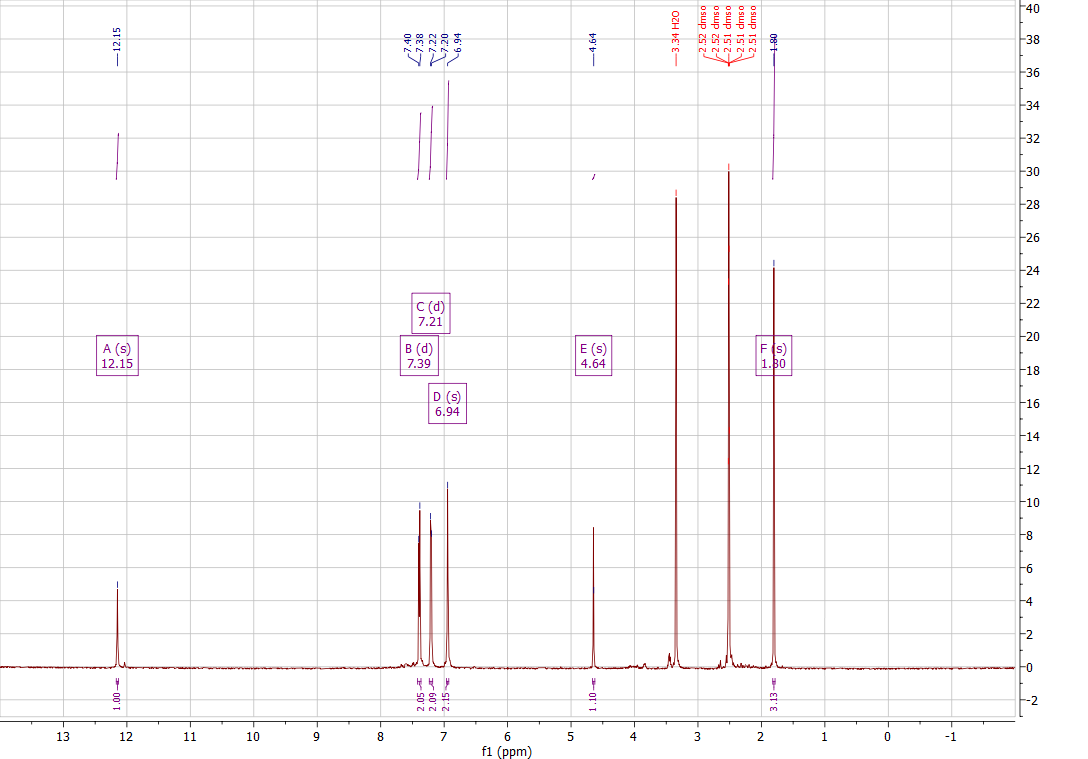


**Fig. S12.** 1H NMR spectrum of compound (**6a**).


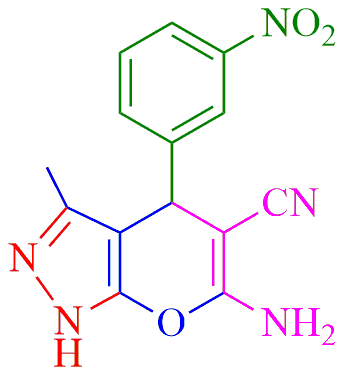

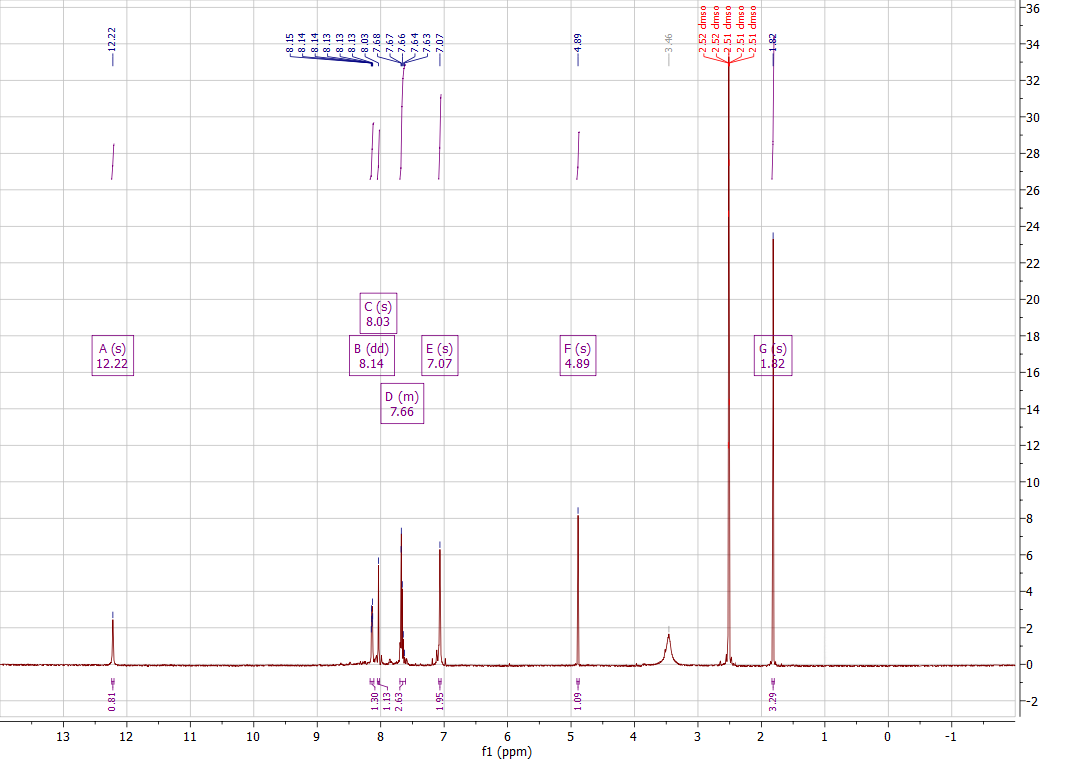


**Fig. S13.** 1H NMR spectrum of compound (**6k**).



**
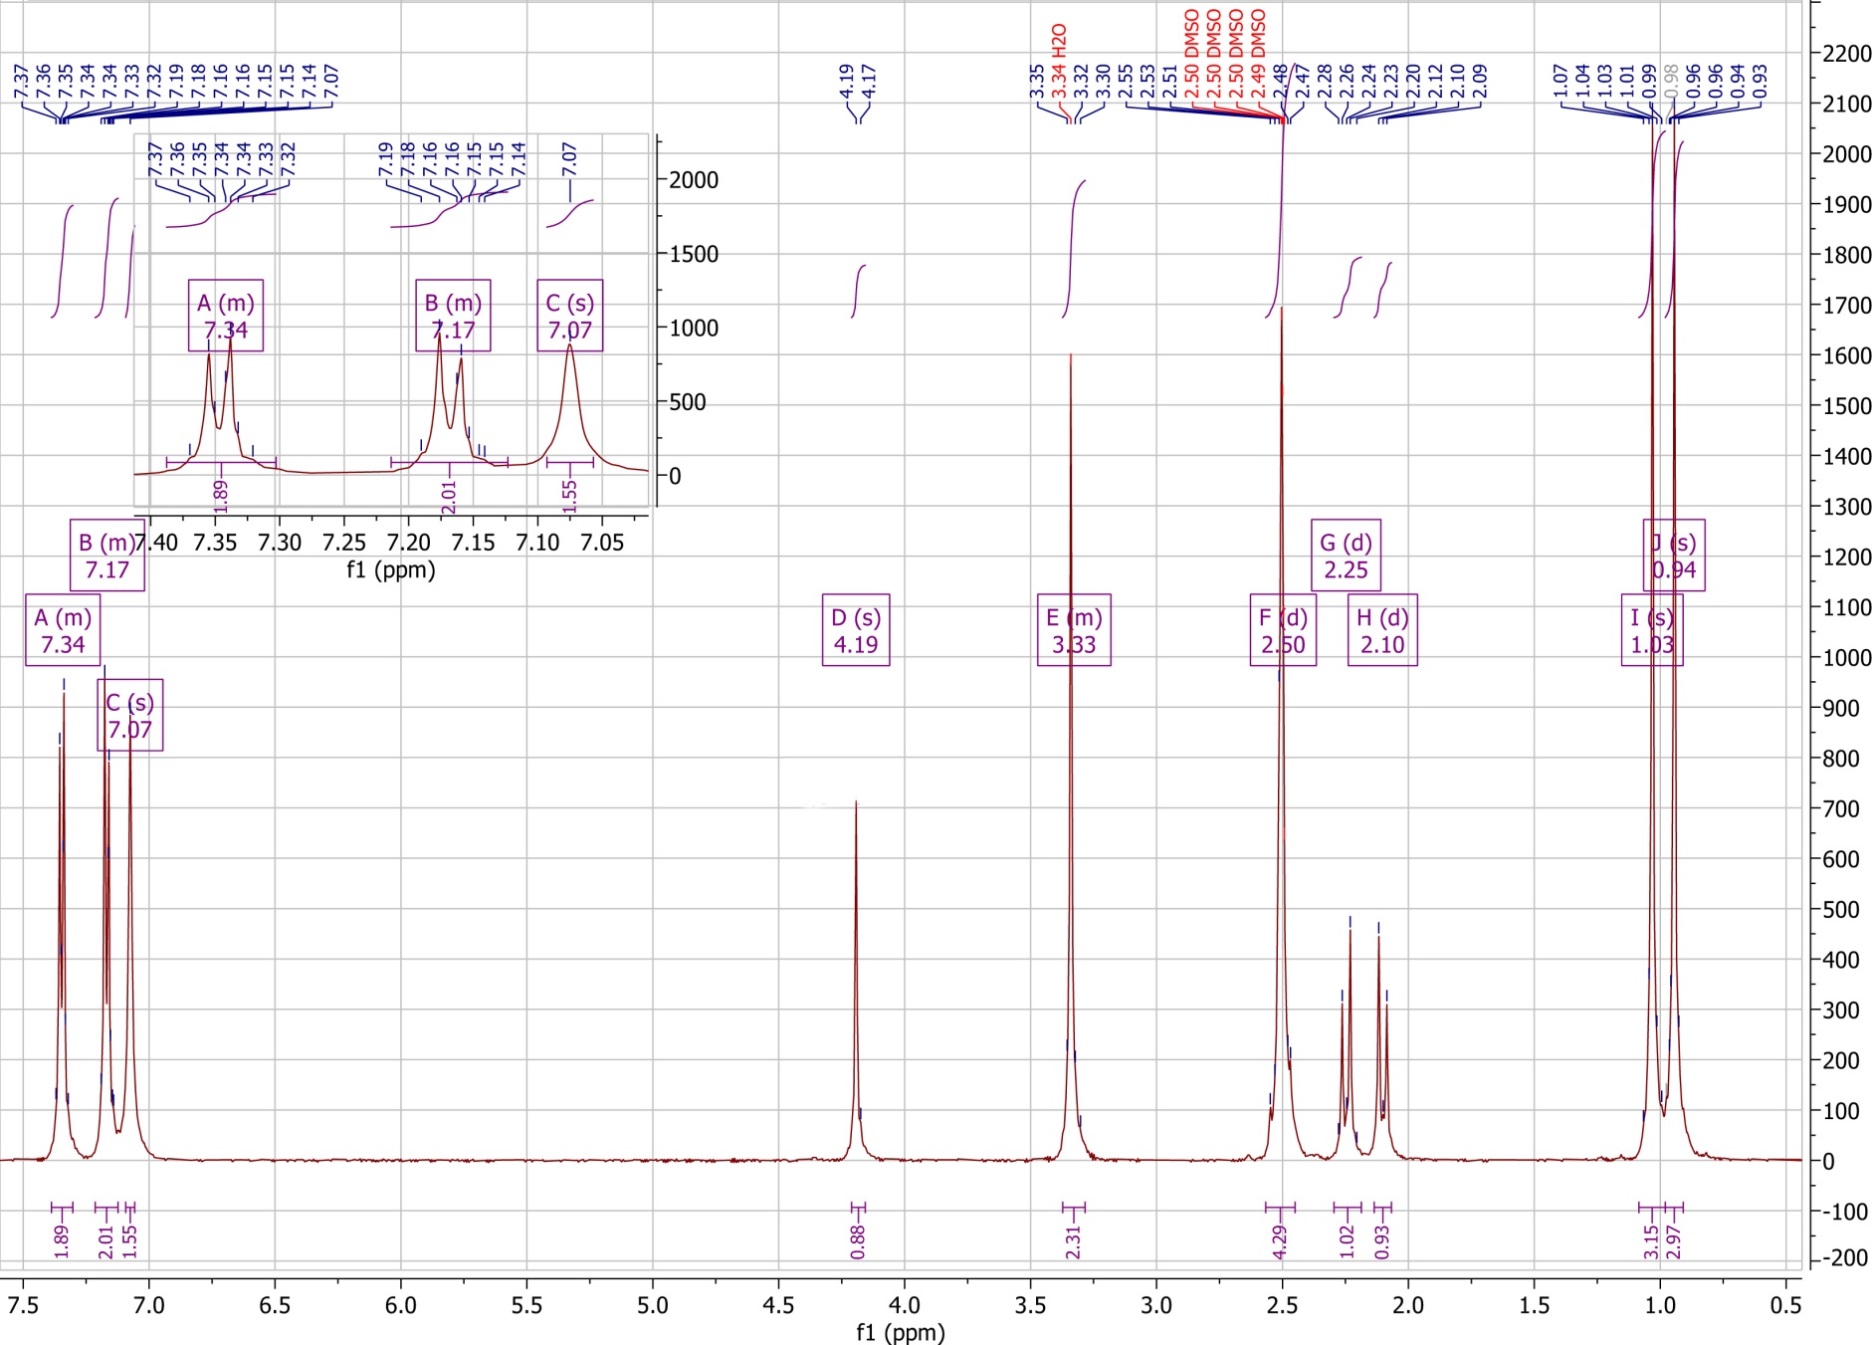
**

**Fig. S14.** 1H NMR spectroscopy of the 4*H*-pyran (**7a**).

**
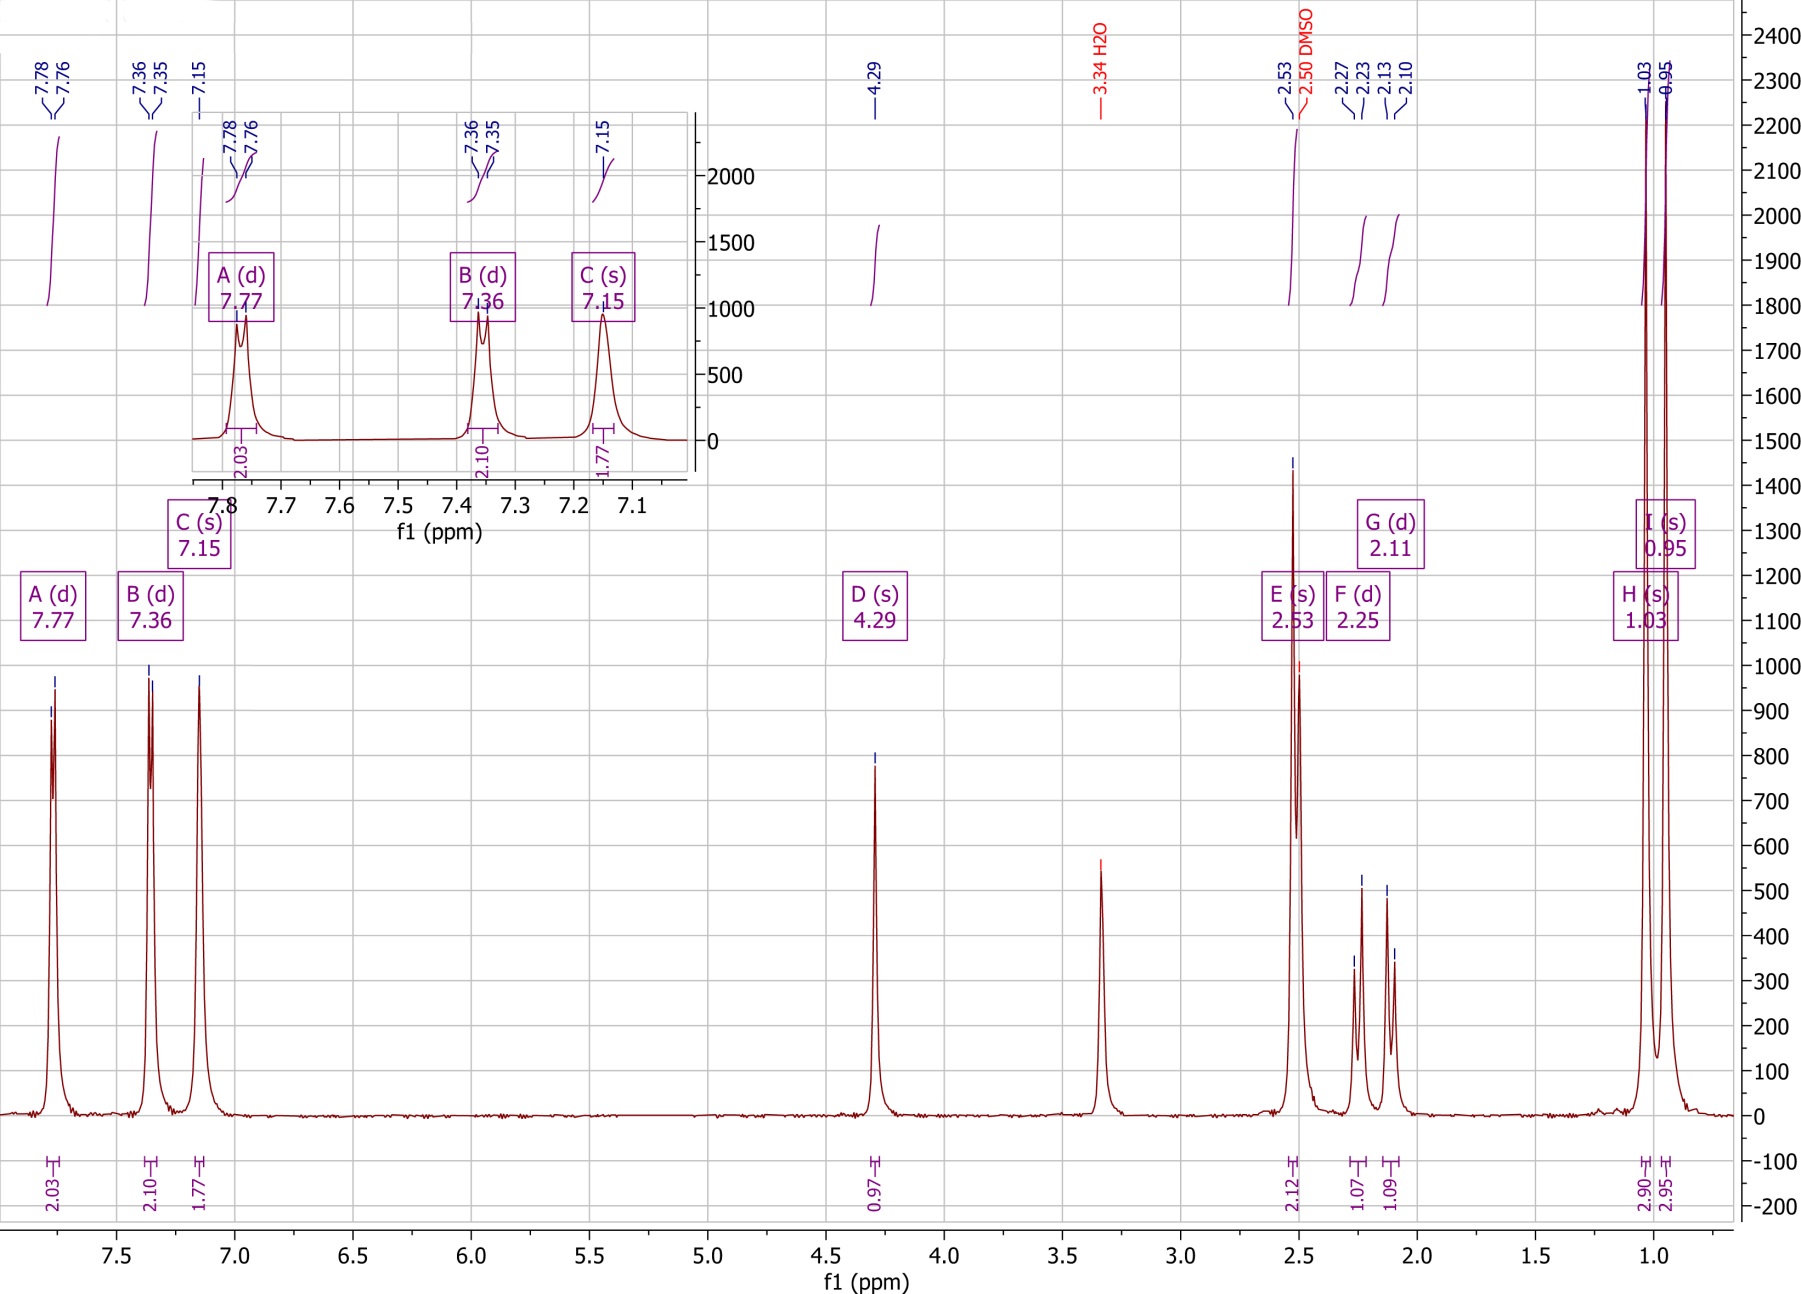
**





**Fig. S15.** 1H NMR spectroscopy of the 4*H*-pyran (**7j**).

**

**
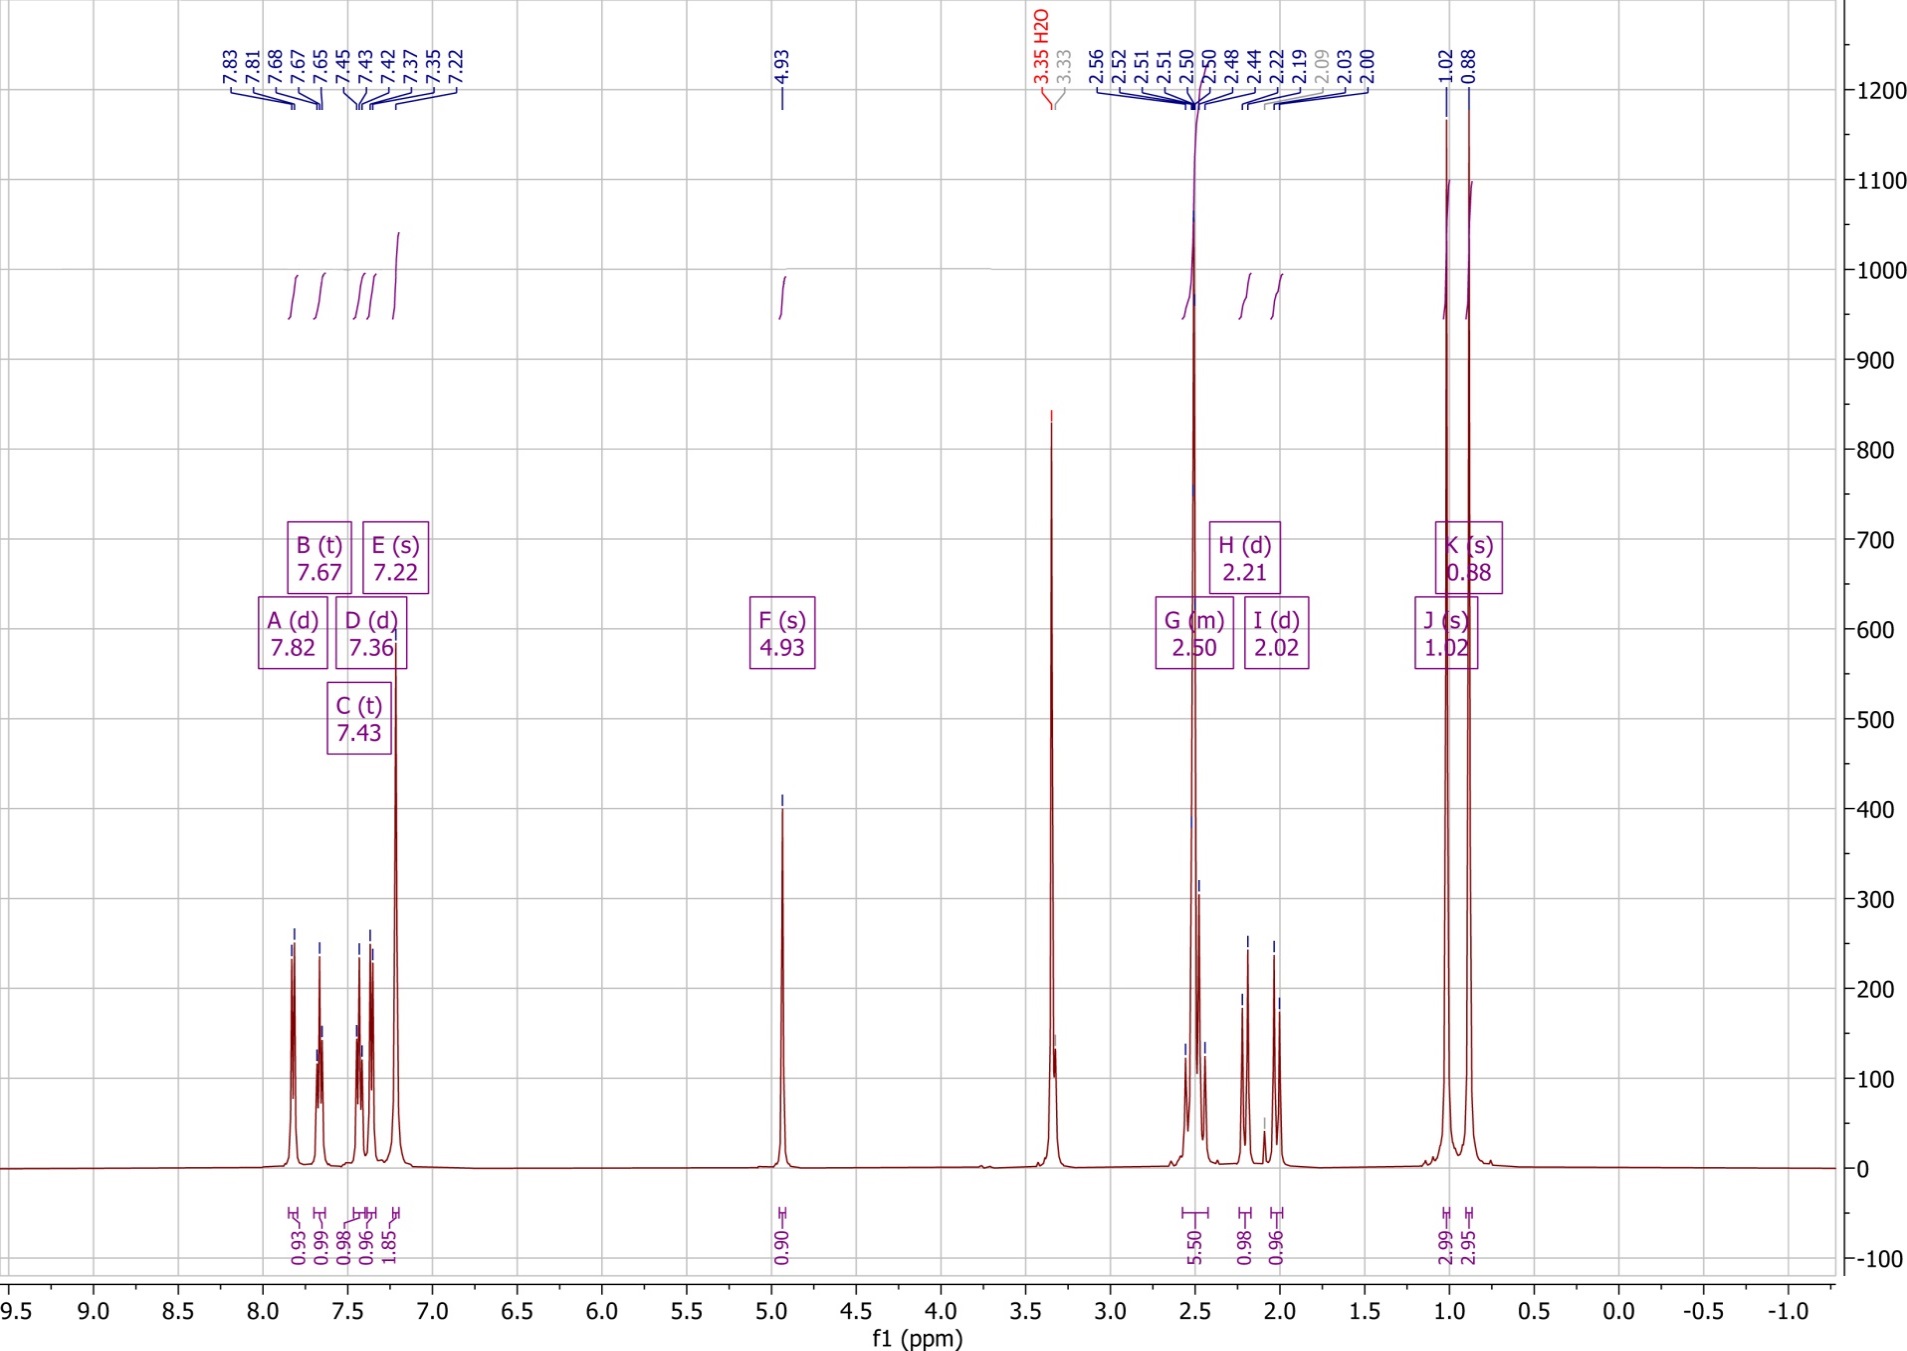


**Fig. S16.** 1H NMR spectroscopy of the 4*H*-pyran (**7i**).
